## **Field Potential Image Classification of Pacemaker Micro-coordination in the Intestine of the Mouse**

Naoko Iwata<sup>1</sup>, Chiho Takai<sup>1</sup>, Naoto Mochizuki<sup>1</sup>, Mariko Yamauchi<sup>1</sup>,  
Yoshiyuki Kasahara<sup>2</sup>, Shinsuke Nakayama<sup>1,\*</sup>

<sup>1</sup>Department of Cell Physiology, Nagoya University Graduate School of Medicine,  
Nagoya 466-8550, Japan

<sup>2</sup>Department of Fetal and Maternal Therapeutics, Tohoku University Graduate School  
of Medicine, Sendai 980-8575, JAPAN

**Corresponding author:** Shinsuke Nakayama\*

Department of Cell Physiology, Nagoya University Graduate School of Medicine,  
65 Tsurumai-cho, Showa-ku, Nagoya 466-8550, JAPAN

Phone: +81 52 744 2045      Fax: +81 52 744 2048

E-mail: [h44673a@nucc.cc.nagoya-u.ac.jp](mailto:h44673a@nucc.cc.nagoya-u.ac.jp)

ORCID: 0000-0003-4933-5429

**Running title:** MEA Classification of Pacemaker Micro-coordination

## **Abstract:**

The flexible and sophisticated movement of the gastrointestinal (GI) tract implies the involvement of mechanisms that are intellectually coordinating excitation in micro-regions other than the neural reflex. We thus performed image analysis of pacemaker micro-coordination in the small intestine of mice, which contains network-forming pacemaker cells. Field potentials were recorded by a dialysis membrane-reinforced microelectrode array (MEA). The micro-coordination of pacemaker activity varied considerably although four basic patterns were identified. Two major patterns of pacemaker activity were ‘expanding’ and ‘migrating’, defined as the initiation from and propagation to the MEA sensing area, respectively. The existence of ‘expanding’ and ‘migrating’ patterns were attributed to duplicated pacemaker current systems such as intracellular  $\text{Ca}^{2+}$  oscillation-activated and voltage-gated mechanisms. Consequently, these patterns reflect spontaneity and synchrony/continuity, respectively. The initiation region of ‘expanding’ activity fluctuated while the direction of ‘migrating’ activity changed, even reversibly. The ‘bumpy’ pattern was characterized by spatiotemporal irregularity and was associated with local impairment of excitability, while the ‘colliding/converging’ pattern involved the interaction of multiple activities in the MEA sensing area. Therefore, both represent the disruption of synchrony/continuity. Interconversion between the four micro-coordination patterns occurred in the same area. 5-Hydroxytryptamine (5-HT) promoted ‘migrating’ activity, accompanied by decreases in ‘bumpy’ and ‘colliding’ events, implying an improvement/restoration of spatial conductivity. These results agree well with the action of 5-HT to change GI movement toward propulsion. In conclusion, our MEA method of image classification enables the quantitative assessment of spatio-temporal excitation underlying GI motility, and is especially useful in small model animals.

**Keywords:** Microelectrode array, dialysis membrane, field potential imaging, classification, gut pacemaker

## **Author contributions:**

NI: Investigation, Data curation, Visualization, Validation, Writing – review & editing

CT: Investigation, Data curation, Visualization

MY: Investigation Data curation.

NM: Investigation Data curation, Writing – review & editing.

NK: Conceptualization, Validation.

SN: Conceptualization, Methodology, Investigation Data curation, Validation, Funding acquisition, Supervision, Writing – original draft.

## Introduction

The flexible and sophisticated movement of the gastrointestinal (GI) tract implies an underlying mechanism that intellectually coordinates excitability in microregions, and is additionally operated with the reflex of intrinsic neural circuits. The patterns of GI movement are often described using simple terms such as ‘segmentation’ and ‘peristalsis’ for agitation and transportation of the luminal contents, whereas, in reality, the GI tract exhibits smooth, elaborate and highly varied movements that show subtle changes between cycles. Interestingly, the complexity of this regulatory system is illustrated by the interaction of GI motility with subconscious thoughts and emotions, which is mediated via autonomic neurons and circulating hormones/cytokines and influences health/disease conditions of the GI tract (Fukudo, 2007; Van Oudenhove et al. 2016; Kaelberer et al. 2018). For example, bowel dysmotility diseases such as irritable bowel syndrome (IBS) are associated with uncoordinated GI movements that enhance feelings of discomfort and stress through brain-gut interactions.

In this study, we describe the micro-coordination patterns of pacemaker activity in the small intestine, which were investigated using a microelectrode array (MEA) technique that we refined for this purpose. Visualization of the MEA field potential data revealed huge variations of spatiotemporal pacemaker activity in microregions, and enabled us to classify them into four basic patterns. In addition, 5-hydroxytryptamine (5-HT, serotonin), which is known to promote propulsive movements (Bülbring and Lin, 1958; Mawe and Hoffman, 2013), exerted consistent modulatory effects on the micro-coordination patterns with its function *in vivo*. To date, intrinsic neural circuits are thought to play a major role in coordinating GI movements (Bayliss and Starling, 1899; Spencer et al. 1999) whereas the network-like structure and dense distribution of interstitial cells of Cajal (ICCs), also referred to as pacemaker cells, imply their potential for precise spatio-temporal coordination (Faussonne-Pellegrini, 2005; Nakayama et al. 2006; Lammers et al. 2008; Huizinga and Lammers, 2009). We anticipate that the visualized micro-coordination patterns of pacemaker potentials support a more realistic understanding of flexible and sophisticated GI movement, and that our method of image classification will be beneficial for functional assessment of the GI tract in health and disease, especially in small model animals.

## Materials and Methods

### *Animals and preparations*

Animals were treated ethically in accordance with the guidelines for the proper conduct of animal experiments published by the Science Council of Japan. All procedures were approved by the Animal Care and Use Committee of Nagoya University Graduate School of Medicine (Permissions #28316, #29121, #30312 and #31199). C57BL/6J wild-type mice and  $W/W^v$  (WBB6F1/Kit-Kit<sup>W</sup>/Kit<sup>W-v</sup>/Slc) mice that lack ICCs in the intestine (8–40 weeks old, Japan SLC, Hamamatsu, Japan) were sacrificed by cervical dislocation after the inhalation of carbon dioxide. The whole GI tract was quickly resected, and the ileum was isolated in a glass dish mounted with silicone rubber. The entire muscularis mucosae containing the myenteric plexus was isolated from the mucous membrane.

### *Immunohistochemistry*

Samples of the ileal musculature were fixed with acetone, blocked with 1% bovine serum albumin (BSA), stained with phycoerythrin-conjugated anti-c-kit rat monoclonal antibody (clone 2B8, eBioscience, San Diego, CA, USA) and mounted on a glass slide with an anti-fading agent (ProLong, Molecular Probes, Thermo Fisher Scientific, Waltham, MA, USA). Transmission and fluorescence images were acquired simultaneously by using an inverted confocal microscope (A1, Nikon, Tokyo, Japan).

### *Solutions and drugs*

The extracellular solution used for the MEA recordings was a modified Krebs solution with the following composition (in mM): NaCl 125, KCl 5.9, MgCl<sub>2</sub> 1.2, CaCl<sub>2</sub> 2.4, glucose 11, and Tris-HEPES 11.8 (pH 7.4). Nifedipine, 5-HT hydrochloride, 2Me-5HT and ondansetron were purchased from Sigma-Aldrich (St Louis, MO, USA). Nifedipine (2 μM) was applied to block L-type voltage-gated Ca<sup>2+</sup> channels and thereby suppress smooth muscle contraction.

### *Electrical recordings*

We developed the dialysis membrane-reinforced MEA recording technique to stably monitor the micro-organization of ICC pacemaker activity in the GI tract of small animals (Iwata et al. 2017; Morishita et al. 2017) because previous multi-electrode array studies had been limited to large animals and humans (Lammers et al. 2008; O'Grady, 2012; Sanders et al. 2016; Huizainga, 2017; O'Grady et al. 2017). An 8 × 8 array of microelectrodes (P515A, Alpha MED Scientific, Ibaraki, Japan) was used to measure electric activity in the ileum. The inter-electrode distance of the MEA was 150 μm, and the sensing area was ~ 1 mm<sup>2</sup>. Samples of mouse ileal muscle sheets were firmly mounted onto the MEA, with the longitudinal muscle layer facing downward, using a small piece of dialysis membrane (cellulose tube, Visking, Chicago, IL, USA) and a slice anchor (SDH series, Harvard Apparatus Japan, Tokyo, Japan). A large reference electrode made of platinum was immersed in the extracellular solution (Fig.1A,B). During the propagation of pacemaker potentials, the membrane currents ( $I_M$ ) flowing through the access resistance ( $R_a$ ) between the sensing and reference electrodes changed the field potential ( $I_M \times R_a$ ). A set of 8 × 8 field potentials was simultaneously recorded using a multi-channel AC amplifier that stabilized the baseline potential with high-pass filtering at 0.1 Hz and reduced noise with low-pass filtering at 10 kHz in accordance

This manuscript was first published as a preprint in bioRxiv,  
doi:10.1101/2021.05.29.446256

with conventional extracellular electrode recording techniques (Astrand et al. 1988). The arrayed data were digitized and stored by a personal computer using a 14-bit A/D converter with a sampling rate of 20 kHz (50- $\mu$ s intervals). The dynamic range of A/D conversion was usually set to  $\pm 1$  mV with a digital resolution of  $\sim 0.12$   $\mu$ V.

For all samples, the oral and anal ends of the muscles were oriented toward the upper and lower ends of the MEA, respectively. The dialysis membrane had a molecular weight cut-off of 12,000, thus oxygen, ions and energy metabolites could be exchanged. The MEA recording chamber ( $\sim 2$  mL in volume) was placed on a heater maintained at  $\sim 34^\circ\text{C}$ . The samples were incubated at least 20 min before MEA recordings. Nifedipine (2  $\mu\text{M}$ ), a dihydropyridine  $\text{Ca}^{2+}$  channel antagonist, was added to the extracellular medium to selectively block L-type voltage-gated  $\text{Ca}^{2+}$  channels (a major  $\text{Ca}^{2+}$  influx pathway in GI smooth muscle) (Akbarali et al. 2010) and suppress smooth muscle contraction without impeding the pacemaker activity of ICCs (Kito and Suzuki, 2003). The above procedures stabilized the electric conditions to enable recordings to be made over a long period of time.

Each sensing microelectrode of the MEA (P515A) had a square profile with a side length of  $\sim 50$   $\mu\text{m}$  and was made from deposited platinum black nanoparticles, which increased the surface area by  $\sim 200$ -fold (equivalent to  $0.5$   $\text{mm}^2$ ) (Fig. 1A,B). From the capacitance ( $C_{\text{ME}}$ : 0.052  $\mu\text{F}$ ) and resistance ( $R_{\text{ME}}$ : 15  $\text{k}\Omega$ ) of the sensing microelectrode, the estimated impedance was sufficiently low to follow a wide frequency range of electric signals (Taniguchi et al. 2013; Iwata et al. 2017). For instance, the impedance ( $Z_{\text{ME}}$ ) of the sensing electrode at 0.1 Hz [ $\sim 31$   $\text{M}\Omega = \sqrt{\{1/(2\pi \times 0.1 \text{ Hz} \times 0.052 \mu\text{F})^2 + (15 \text{ k}\Omega)^2\}}$ ] was sufficiently small compared with the input resistance of the multi-channel amplifier used in this study (100  $\text{M}\Omega$ ). Thus, the efficacy of electric signal transmission ( $Tr$ ) was estimated to be  $\sim 95\%$  at 0.1 Hz [ $100 \text{ M}\Omega / \sqrt{\{(100 \text{ M}\Omega)^2 + (31 \text{ M}\Omega)^2\}}$ ].

#### *Data analysis and field potential imaging*

The arrayed field potential data were acquired at a 14-bit depth with a sampling interval of 50  $\mu\text{s}$ . The digital resolution was reduced to 0.5–25 ms to display the time course of the pacemaker oscillations. Data processing, including digital filtering and linear spectrum analysis, was performed using commercial software (Kaiseki, Kyowa Electronic Instruments, Tokyo, Japan; Mobius, Alpha Med Scientific, Ibaraki, Japan; MATLAB software package, MathWorks, Natick, MA, USA).

For potential mapping, after reducing the digital resolution to 5 ms, field potential data were processed by a band-pass filter at 0.25–10.5 Hz. Numerous factors, including variations in  $R_{\text{ME}}$  and  $R_a$  and differences in  $I_M$  between different populations of pacemaker and modulator cells, were considered to affect the magnitude of the field potential oscillation. Therefore, to compensate for these factors and reconstitute a smooth field potential map, the amplitude of the field potential recorded in the  $n^{\text{th}}$  microelectrode region [ME(n)] was corrected by a normalizing factor [ $F_N(n)$ ]:

$$LS_{0.25-10.5}(n)/\text{sum}[LS_{0.25-10.5}(n = 1 \text{ to } 64)]/64,$$

where  $LS_{0.25-10.5}(n)$  is the density of the linear spectrum in the frequency range between 0.25–10.5 Hz for the field potential data at ME(n). To avoid excessive compensation,  $F_N(n)$  was limited to within  $1.0 \pm 0.5$ . The sum of the  $LS_{0.25-10.5}$  values for all 64 MEs

This manuscript was first published as a preprint in bioRxiv,  
doi:10.1101/2021.05.29.446256

was used to represent the magnitude of the pacemaker activity. Subsequently, the  $8 \times 8$  field potentials were interpolated with 50 points using a 'cubic' protocol, and each point of the field potential map was displayed as a 'hot' map (MATLAB software package) (Morishita et al. 2017).

### *Statistics*

Numerical data are expressed as the mean  $\pm$  S.D. Comparisons of normally distributed datasets were made using paired *t*-tests.  $P < 0.05$  was considered statistically significant.

## Results

### *Four basic patterns of pacemaker micro-coordination*

Our dialysis membrane-reinforced MEA technique enabled electric activity in the GI tract of small animal models to be stably monitored. Smooth muscle sheets isolated from mouse ileum were mounted on an  $8 \times 8$  MEA with an interpolar distance of  $150 \mu\text{m}$  and a sensing region of  $\sim 1 \text{ mm}^2$ . Each smooth muscle sheet was mounted beneath a piece of dialysis membrane that maintained the conditions required for electric recording, such as the access resistance ( $R_a$ ) between the sensing and reference electrodes and the isolation resistance between the sensing electrodes, while allowing the exchange of ions and metabolites needed for spontaneous electric activity (Fig. 1A,B). In addition, a dihydropyridine  $\text{Ca}^{2+}$  channel antagonist (nifedipine) was added to suppress smooth muscle contraction without inhibiting pacemaker activity. The MEA detected field potential changes generated by the pacemaker activity of network-forming ICCs (Fig. 1C,D). This was confirmed by the MEA measurement in  $W/W^v$  mice that lacks network-forming ICCs in the ileum (Supplemental Fig. S1). The frequency of pacemaker activity ranged from 10–35 cycles per min (cpm), agreeing well with values reported for ICCs in the myenteric plexus region (Kito and Suzuki, 2003).

The pacemaker potentials recorded by the  $8 \times 8$  MEA were reconstructed into pseudo-color potential images (Fig. 1E) in which positive and negative field potentials, reflecting outward and inward currents, were assigned dark and light colors, respectively. Visualization of the MEA measurements enabled us to classify the micro-coordination of the pacemaker potentials into four basic patterns: ‘expanding’, ‘migrating’, ‘bumpy’ and ‘colliding/converging’ activities (explained by examples in Fig. 1F; also see Supplemental Videos SV1–4.). Under the control condition (1305 events detected for 3445 s,  $N = 49$  series of MEA experiments), ‘expanding’ and ‘migrating’ were two major activities with an occurrence of 7.76 and 9.51 events per min, respectively.

The ‘expanding’ pattern was defined by the initiation of spontaneous electric activity in the MEA sensing area and a subsequent progressive expansion of the active region while the activity of the initiating region gradually subsided. As a result, ‘expanding’ activity typically formed an annular shape during the late phase (Expanding in Fig. 1F; Supplemental Video SV1). ‘Migrating’ activity was defined by pacemaker activity propagating from a region adjacent to the MEA sensing area, and was manifested by an elongated active (light-colored) region that propagated approximately orthogonally to its long axis over the MEA sensing area (Migrating in Fig. 1F; Supplemental Video SV2). An additional feature of typical ‘migrating’ activity was a dark-colored area (indicating a transient positive potential) preceding the light-colored active area (further explanation is provided below).

By contrast, ‘bumpy’ activity was defined by a lack of spatiotemporal regularity in various micro-regions of the MEA sensing area, thereby indicating poor and spatially confined electric coupling. In the example (Bumpy in Fig. 1F; Supplemental Video SV3), spontaneous activity was initiated in the upper-left region and propagated toward the lower-right region while avoiding the lower-left region. A fourth type of micro-coordination pattern was termed ‘colliding/converging’ activity, in which multiple propagating pacemaker potentials interacted in the MEA sensing area. Namely, they collided and/or converged to either annihilate each other (Colliding in Fig. 1F;

Supplemental Movie SV4) or merged and propagated in a different direction (explained later).

#### *Variations in the micro-coordination of pacemaker activity*

Visualization of the MEA field potential data enabled us to realize considerably large variations of spatio-temporal pacemaker activity. Even in the same muscle sample the initiating region of ‘expanding’ propagations fluctuated in the MEA sensing area (Fig. 2A). In this sample, a continuous recording demonstrated that most cases of propagating activity were of the ‘expanding’ type (12 out of 13 cycles), including the first three activities (in field potential traces in Fig. 2A). The first event was initiated in the upper-left region and propagated to adjacent regions (Expanding-1), the second event was initiated in the lower-right region (Expanding-2), and the third event was initiated near the center (Expanding-3) before expanding in an annular pattern (Supplemental Video SV5).

‘Migrating’ activity exhibited variations in the direction of propagation (Fig. 2B). Notably, longitudinal propagation of activity in these two samples occurred in opposite directions, namely in the aboral (oral-to-anal, ordinarily transporting) direction (Migrating-L1) and oral direction (Migrating-L2). In addition, pacemaker activity reversed in the circular (transverse) direction (Migrating-C1 and C2 in Supplemental Fig. S2), and propagated diagonally (Migrating-D1; Migrating-D2 in Supplemental Fig. S2). The finding that ‘migrating’ activity propagated in various directions rather than following the course of the muscle layers and enteric innervation suggests a major contribution of the ICC network (Fig. 1D) to the generation of this activity. We also noted that numerous features of propagation (i.e., the amplitude and rate as well as the direction) varied within the same muscle sample, even between two successive cycles of activity (Supplemental Video SV6).

Careful comparisons of potential images and field potential traces in ‘expanding’ activity indicated that the pacemaker potential lacked a preceding transient positive potential in the initiating micro-region (blue arrow in Fig. 2A). On the other hand, in ‘migrating’ activity, a dark-colored area preceded a light-colored area when activity propagated from the adjacent area of the MEA sensing area (Fig. 2B; Supplemental Fig. S2). This corresponds to a transient positive potential (red arrowhead) preceding the fast down-stroke of the pacemaker potential.

In ‘migrating’ activity, the light- and dark-colored areas are considered to be the ‘source’ and ‘sink’ of a local circuit current, respectively (see schematic illustrations in Fig. 2C and Supplemental Fig. S3). The sink progressively charges until the pacemaker current is activated in that region, thereby propagating the pacemaker activity sequentially along the muscle sheet, which acts as a ‘volume conductor’. The cells in the micro-region near microelectrode ME(2) are in the active (‘A’) state, generating voltage-gated pacemaker inward current. At the same time, ME(3) and ME(4) sense changes in field potential due to the propagation of the pacemaker current via gap junction channels which electrically couple the cells. This cell-to-cell propagation of current that converts the cells from the resting (‘R’) state to the charging (‘C’) state, charges the plasma membranes until voltage-gated inward current is activated. On the other hand, ME(1) senses field potentials while the cells in that micro-region are in a slowly oscillating (‘S’) refractory state (a plateau phase that is associated with both inward and outward currents of Ca<sup>2+</sup>-activated Cl<sup>-</sup> channels and K<sup>+</sup> channels,

respectively). Since the plasma membranes in the microregion near ME(1) are already positively charged, pacemaker current propagates toward the cells in the ‘C’ state, i.e., in the direction of ME(3) and ME(4).

A cellular model of ‘expanding’ activity, which does not have a transient positive potential preceding the pacemaker current, can be constructed by adding an ‘initiating’ (‘I’) state (scheme in Fig. 2D). We consider the initiation of pacemaker activity to involve a  $\text{Ca}^{2+}$  clock such as the activation of  $\text{Ca}^{2+}$ -activated inward current in response to the spontaneous release of  $\text{Ca}^{2+}$  from the endoplasmic reticulum (ER) that we previously demonstrated (Aoyama et al. 2004; Saeki et al. 2019). After ‘expanding’ activity has been initiated by a  $\text{Ca}^{2+}$  clock mechanism, it can subsequently propagate away from the initiating region by the same mechanism as ‘migrating’ activity. Nevertheless, some of the pacemaker potentials near the initiating site did not have preceding positive potentials, indicating that propagation in the immediate vicinity of the initiating region was not always due to ‘migrating’ activity (Fig. 2A). In such cases, the pacemaker activity may have been propagating through a microregion that coincidentally contained cells in the ‘I’ state in addition to cells in the ‘C’ state. This possibility would agree well with the shift in the position of the initiating region that was observed in some samples.

#### *Interconversion of micro-coordination patterns*

In addition to the large variations seen within the same category of micro-coordination pattern, we also observed interconversion between micro-coordination patterns ( $N = 24$  experiments). The frequency of interconversion differed substantially between samples. Continuous MEA recordings from a muscle sheet with frequent interconversions exhibited eight consecutive pacemaker activities: one ‘migrating’, four ‘expanding’ (with different initiating regions), two ‘colliding’ and one ‘bumpy’ (Fig. 3A). The ‘migrating’ activity occurred in the diagonal direction (Fig. 3B), and the ‘expanding’ activity was initiated in the upper-left region (Fig. 3C; the last ‘expanding’ event in Fig. 3A). The ‘bumpy’ event initially propagated from the lower region of the image in the aboral direction, but the activity only reached the upper-left region and failed to propagate to the upper-right region (Fig. 3D). In the first of the two ‘colliding’ events (Colliding-1: Fig. 3E), two pacemaker activities expanded from the upper-left and lower-middle regions to collide near the center, following which the merged activity propagated toward the upper-right region. In the second ‘colliding’ event (Colliding-2: Fig. 3F), two pacemaker activities initially propagated similar to the first ‘colliding’ event, but the merged activity did not propagate further due to the presence of a slowly oscillating potential in the middle-right region (‘bumpy’ spot in Fig. 3F). We speculate that the aberrant slow potential substantially prolonged refractory period of pacemaker cells in this region, resulting in a ‘bumpy’ event. Indeed, various types of regional aberrant electric activity were associated with ‘bumpy’ events. For example, in another sample showing an interconversion of micro-coordination patterns, multiple pacemaker activities occurred independently in the small recording area and were separated by a ‘bumpy’ spot where rapid potentials run frequently (Supplemental Fig. S4).

#### *Proof-of-concept through the action of 5-HT*

Since 5-HT is an important signaling molecule known to modulate GI movement (Spiller, 2011; Mawe and Hoffman, 2013), we examined whether 5-HT influenced the

This manuscript was first published as a preprint in bioRxiv,  
doi:10.1101/2021.05.29.446256

micro-coordination of pacemaker activity (Fig. 4). An example of a series of MEA recordings from a muscle sheet demonstrated frequent pacemaker activities of ‘expanding’ pattern: a typical cycle involved the initiation of activity in the upper-middle region in control conditions (Fig. 4A,B; Supplemental Video SV7), and those converted into ‘migrating’ pattern in the presence of 5-HT (100  $\mu$ M), accompanied by the increase in the frequency (Fig. 4C,D; Supplemental Video SV8). Linear spectrum analysis of the 0.25–10.5 Hz frequency range ( $LS_{0.25-10.5\text{Hz}}$ ) revealed no significant effect of 5-HT on the magnitude of pacemaker activity ( $99.1 \pm 29.8\%$  of the control,  $P = 0.90$ ,  $N = 16$ ; Fig. 4E). The frequency of pacemaker activity was higher in the presence of 5-HT than in its absence ( $27.3 \pm 7.2$  cpm vs.  $21.3 \pm 7.8$  cpm,  $P = 0.0003$ ,  $N = 16$ ; Fig. 4F). Notably, 5-HT increased the occurrence of ‘migrating’ activity (from 26.3% of 642 events in the absence of 5-HT to 55.9% of 799 events in the presence of 5-HT), while it decreased the occurrence of ‘other’ types of activity (from 23.7% of 642 events under control conditions to 5.3% of 799 events in the presence of 5-HT; Fig. 4G). In a muscle sheet, a typical change of the micro-coordination pattern was recorded: the frequent occurrence of ‘bumpy’ activity in control, on the other hand, all ‘migrating’ activities in the presence of 5-HT (Fig. 5).

5-HT<sub>3</sub> receptors exert excitatory influences on a wide range of GI functions (Talley, 1992; Spiller, 2011). Therefore, our subsequent experiments evaluated whether 5-HT<sub>3</sub> receptors mediated the effects of 5-HT on pacemaker activity. The application of 2-methyl-5-HT (2Me-5HT, 50  $\mu$ M), a 5-HT<sub>3</sub> receptor agonist, increased the frequency of pacemaker activity ( $24.8 \pm 5.1$  cpm vs.  $21.1 \pm 2.7$  cpm,  $P = 0.056$ ,  $N = 5$ ) with little or no effect on the magnitude ( $LS_{0.25-10.5\text{Hz}}$ :  $105.1 \pm 10.9\%$  of the control,  $P = 0.356$ ,  $N = 5$ ; Fig. 4H,I). Furthermore, the additional application of ondansetron (500  $\mu$ M), a 5-HT<sub>3</sub> receptor antagonist, in the presence of 5-HT decreased both the frequency ( $33.5 \pm 5.7$  cpm vs  $24.1 \pm 4.2$  cpm,  $P = 0.041$ ,  $N = 4$ ) and magnitude ( $LS_{0.25-10.5\text{Hz}}$ :  $45.0 \pm 29.1\%$  of the value in 5-HT alone,  $P = 0.047$ ,  $N = 4$ ; Fig. 6) of pacemaker activity. These results suggested that 5-HT<sub>3</sub> receptors were at least partly responsible for the effects of 5-HT. Nonetheless, the contribution of other subtypes of 5-HT receptors and the role of endogenous 5-HT remains to be elucidated in future experiments.

## Discussion

### *Biological significance of the two major patterns*

The dialysis membrane-reinforced MEA revealed surprisingly large variations in spatio-temporal pacemaker activity with perpetual changes between cycles, and enabled us to classify them into four basic patterns. Pacemaker potentials in the small intestine are synchronized with intracellular Ca<sup>2+</sup> oscillations (Torihashi et al. 2002; Park et al. 2006). Therefore, the initiation of a pacemaker potential, such as ‘expanding’ activity in the MEA sensing area, is considered to reflect the Ca<sup>2+</sup> clock mechanism operated by the co-existence of ryanodine receptors and inositol 1,4,5-trisphosphate receptors [IP<sub>3</sub>Rs] in the ER of ICCs (Aoyama et al. 2004; Saeki et al. 2019) that consequently activates transmembrane Ca<sup>2+</sup>-activated Cl<sup>-</sup> channels such as anoctamin-1 (Dickens et al. 1999; Hwang et al. 2009). On the other hand, ‘migrating’ activity represents the propagation of pacemaker activity from a region adjacent to the MEA sensing area. The two major micro-coordinations, ‘expanding’ and ‘migrating’, are thus considered to represent spontaneity and synchrony/continuity in the MEA sensing area, respectively.

Typical ‘migrating’ activity was characterized by a dark-colored (positive potential) area at the front of the propagating waveform that was followed by a light-colored (negative potential) area. The spatiotemporal relationship between the light- and dark-colored areas implies that intercellular coupling causes the ICCs in the dark-colored region to become electrically charged by the intercellular pacemaker current that has been activated in the ICCs in the light-colored region (sink and source regions, respectively, in Fig. 2C). In other words, pacemaker activity propagates through a core conductor due to the formation of local circuits. This can be explained by the involvement of voltage-gated inward current due to TTX-resistant  $\text{Na}^+$  channels ( $\text{Na}_v1.5$ ) (Strege et al. 2005) and/or atypical non-selective cation channels (Goto et al. 2004) in the pacemaker current during the propagation process. In addition, we need to bear in mind that the  $\text{Ca}^{2+}$ -activated pacemaker current also forms the basis of coordinating GI movement, as long-distance coupling by a  $\text{Ca}^{2+}$  clock mechanism (van Helden and Imtiaz, 2003).

Both ‘expanding’ and ‘migrating’ activities showed large variations. Notably, ‘migrating’ activity was able to propagate in any direction (including oral, aboral, circumferential and diagonal), and ‘expanding’ activity was observed to propagate in all directions from the initiating region. Although ‘expanding’ activity generally propagated away from the initiation site by a mechanism similar to that of ‘migrating’ activity (i.e., intercellular currents), one interesting observation was that preceding positive potentials were not always observed (Fig. 2A), indicating mechanisms other than voltage-gated ‘migrating’ process in the propagation near the initiating region. A possible interpretation is that pacemaker activity had propagated through a micro-region that coincidentally contained cells in the ‘I’ state (i.e., in the process of initiating their own intracellular  $\text{Ca}^{2+}$  oscillations via a  $\text{Ca}^{2+}$  clock mechanism: Fig. 2E), and this proposal was consistent with the observed variations in the position of the initiating site (Fig. 2A). An alternative possibility is that a small group of cells neighboring the initiating region were activated by the intercellular propagation of  $\text{Ca}^{2+}$  or intracellular messengers (e.g.,  $\text{IP}_3$ ) via gap junctions, which has been reported for other cell types (Halidi et al. 2011).

#### *Alteration of micro-coordination patterns relating with motor function*

The propagation of ‘bumpy’ activity was characterized by a lack of spatiotemporal regularity likely due to impaired electric connectivity between micro-regions. This disruption of electric communication may be attributed to irregularities of the refractory period in pacemaker cells within spatially localized areas. Some ‘bumpy’ events obviously occurred in micro-regions of impaired excitation (‘bumpy’ spot), associated with aberrant electric activities (rapid potentials in Supplemental Fig. 5C; slow potentials after ‘colliding’ events in Fig. 3F). In the small intestine, it has been shown that the aberrant slow electric oscillations generated in ICCs-DMP yield segmentation of the tract by waxing and waning the basal pacemaker activity in network-forming myenteric ICCs (Huizinga et al. 2014). Interestingly, our visualization study suggests multiple causes for ‘bumpy’ events. Further characterization of aberrant potentials in the microregion is merited in a functional correlation between electrical and mechanical activities. Likewise, ‘colliding/converging’ events of multiple activities represent the disruption of synchrony/continuity, and are thereby related with the occurrence of segmentation movement.

5-HT signaling is involved in promoting the propulsion of foodstuff through the intestine (Bülbring and Lin, 1958; Mawe and Hoffman, 2013). Therefore, the increase in the ratio of ‘migrating’ to ‘bumpy’ and ‘colliding/converging’ events during 5-HT application likely reflects a change in the functional state of the GI tract from segmentation-like movement to propulsion-like movement. In addition, a decrease in the occurrence of ‘bumpy’ activity is equivalent to an improvement in electric connectivity between network-forming myenteric ICCs that enabled pacemaker activity to propagate over a longer range. In turn, this allowed pacemaker activity originating in areas adjacent to MEA to reach the MEA-sensing area more often (Fig. 4H). In line with this notion, we previously demonstrated that 5-HT enlarges the active area of pacemaker  $\text{Ca}^{2+}$  oscillations in cellular organoids obtained from the ileum (Liu et al. 2011). We speculate that 5-HT might act to amplify basal pacemaker activity by suppressing aberrant spontaneous rhythmicity from other cell members (e.g., slow potentials as shown in Fig. 3F) as well as improving local electric conduction in micro-regions (also see Extended Discussion related with 5-HT and IBS).

### *Pathophysiology*

In light of the effects of 5-HT and related chemicals, the pathogenesis of functional bowel motility likely involves excessive modification of pacemaker coordination during dysregulation of 5-HT signaling. Therefore, it will be interesting to establish whether ‘migrating’ activity is enhanced in hypermotility disorders that are associated with an elevation of 5-HT, such as bacterial enteritis, celiac disease and carcinoid tumors. Conversely, enhanced re-uptake of 5-HT would diminish bowel motility. Long (L) and short (S) variants of the serotonin-transporter-gene-linked polymorphic region (5-HTTLPR) are known to increase and decrease 5-HT uptake, respectively, by changing the expression of the 5-HT transporter (Lesch et al. 1996; Kunugi et al. 1996; Murphy and Lesch, 2008). A meta-analysis of epidemiologic studies reported that the LL genotype of 5-HTTLPR was a risk factor for constipation-predominant IBS (IBS-C) (Zhang et al. 2014), raising the possibility that reduced pacemaker activity might contribute to a reduction in propulsion. Interestingly, reduced inhibitory feedback on brain-gut interactions is associated with the development of IBS symptoms due to an amplification of gut activity in response to visceral stimuli via the autonomic nervous system (Hall et al. 2010; Holtmann et al. 2016; Hong et al. 2016). The pacemaker micro-coordination pattern, which underlies smooth and flexible GI movement, may be one of the factors involved in this brain-gut interaction. In addition, a small proportion of IBS-C cases are causally associated with genetic mutation of *SCN5A*, which encodes the pore-forming  $\alpha$ -subunit of a TTX-resistant voltage-gated  $\text{Na}^+$  channel ( $\text{Na}_v1.5$ ). Mutation of *SCN5A* underlies a congenital prolonged QT syndrome caused by prolongation of cardiac depolarization, and mutation of this gene can also induce IBS symptoms (Beyder et al. 2014); this is likely due to a functional disorder of network-forming ICCs that express this channel, because ‘migrating’ activity relies on the activation of voltage-gated inward current by the intercellular conduction of pacemaker current (see the spatiotemporal relationship between the dark-colored charging and light-colored active areas in Fig. 2B and Supplemental Fig. S2). We speculate that loss-of-function mutations of voltage-gated  $\text{Na}_v1.5$  channels would impair ‘migrating’ activity. Furthermore, mutations of atypical non-selective cation channels, if expressed in human ICCs, might also be a potential cause of IBS.

## Conclusion

The visualization of dialysis-membrane-reinforced MEA field potential data revealed large variations in pacemaker micro-coordination, suggesting that the dynamics of pacemaker activity in micro-regions likely underpins flexible and sophisticated movement of the GI tract. Nonetheless, the pacemaker micro-coordination was classified into four basic patterns. ‘Expanding’ and ‘migrating’ patterns were two major patterns, defined by the initiation in and propagation to the MEA-sensing area. Therefore, these patterns represent spontaneity and synchrony/continuity of the area, and were considered to reflect duplicating pacemaker current systems of Ca<sup>2+</sup> oscillation-activated and voltage-gated channels, respectively. ‘Bumpy’ and ‘colliding/converging’ patterns represented the local impairment of conduction and the interaction of multiple activities, respectively, both indicating disruption of synchrony/continuity of the area. The fact that 5-HT modulated the frequency of these patterns agrees well with its action that causes a shift in the contractile function of the GI tract from segmentation to propulsive motions. Further refinement of the methodology and criteria for classifying micro-coordination are required (for example subclassification including the amplitude, direction and distance of propagation in each event, etc.). Despite this, our study provides a proof-of-concept that our method employing image classification of pacemaker micro-coordination enables the quantitative assessment of spatio-temporal excitation underlying GI motility in health and disease, and is especially useful in small model animals.

## Acknowledgments

We are grateful to Tatsuhiro Noda, Hirotaka Morishita and Tomoka Nomura (Department of Cell Physiology, Nagoya University Graduate School of Medicine) for their help with the MEA experiments.

## Funding

This work was partly supported by a grant-in-aid for Scientific Research from the Japan Society for the Promotion of Science (JSPS No. 19H03558) and research grants from the Japan Agency for Medical Research and Development (AMED No. 16ek0210037h0003).

## References

- Akbarali HI, Hawkins EG, Ross GR, Kang M. 2010. *Neurogastroenterol. Motil.* **22**, 1045–1055.
- Aoyama M, Yamada A, Wang J, Ohya S, Furuzono S, Goto T, Hotta S, Ito Y, Matsubara T, Shimokata K, Chen SR, Imaizumi Y, Nakayama S. 2004. Requirement of ryanodine receptors for pacemaker Ca<sup>2+</sup> activity in ICC and HEK293 cells. *J. Cell Sci.* **117**, 2813–2825.
- Astrand P, Brock JA, Cunnane TC. 1988. Time course of transmitter action at the sympathetic neuroeffector junction in rodent vascular and non-vascular smooth muscle. *J. Physiol.* **401**, 657–670.

- Bayliss WM, Starling EH. 1899. The movements and innervation of the small intestine. *J. Physiol.* **24**, 99–143.
- Bülbring E, Lin RC. 1958. The effect of intraluminal application of 5-hydroxytryptamine and 5-hydroxytryptophan on peristalsis; the local production of 5-HT and its release in relation to intraluminal pressure and propulsive activity. *J. Physiol.* **140**, 381–407.
- Dickens EJ, Hirst GD, Tomita T. 1999. Identification of rhythmically active cells in guinea-pig stomach. *J Physiol.* **514**, 515-531.
- Faussone-Pellegrini MS. 2005. Interstitial cells of Cajal: once negligible players, now blazing protagonists. *Ital. J. Anat. Embryol.* **110**, 11–31.
- Fukudo S. 2007. Role of corticotropin-releasing hormone in irritable bowel syndrome and intestinal inflammation. *J. Gastroenterol.* **42** (suppl. 17), 48–51.
- Goto K, Matsuoka S, Noma A. 2004. Role of corticotropin-releasing hormone in irritable bowel syndrome and intestinal inflammation. *J Physiol.* **559**, 411–422.
- Halidi N, Boittin FX, Bény JL. 2011. Propagation of fast and slow intercellular  $Ca^{2+}$  waves in primary cultured arterial smooth muscle cells. *Cell Calcium* **50**, 459–467.
- Hall GB, Kamath MV, Collins S, Ganguli S, Spaziani R, Miranda KL, Bayati A, Bienenstock J. 2010. Heightened central affective response to visceral sensations of pain and discomfort in IBS. *Neurogastroenterol Motil.* **22**, 276-e80.
- Holtmann GJ, Ford AC, Talley NJ. 2016. Pathophysiology of irritable bowel syndrome. *Lancet Gastroenterol Hepatol.* **1**, 133–146.
- Hong JY, Naliboff B, Labus JS, Gupta A, Kilpatrick LA, Ashe-McNalley C, Stains J, Heendeniya N, Smith SR, Tillisch K, Mayer EA. 2016. Altered brain responses in subjects with irritable bowel syndrome during cued and uncued pain expectation. *Neurogastroenterol Motil.* **28**, 127–138.
- Huizinga JD, Lammers WJ. 2009. Gut peristalsis is governed by a multitude of cooperating mechanisms. *Am J Physiol Gastrointest Liver Physiol.* **296**, G1–G8.
- Huizinga JD, Chen JH, Zhu YF, Pawelka A, McGinn RJ, Bardakjian BL, Parsons SP, Kunze WA, Wu RY, Bercik P, Khoshdel A, Chen S, Yin S, Zhang Q, Yu Y, Gao Q, Li K, Hu X, Zarate N, Collins P, Pistilli M, Ma J, Zhang R, Chen D. 2014. The origin of segmentation motor activity in the intestine. *Nat Commun.* **5**, 3326.
- Huizinga JD. 2017. The powerful advantages of extracellular electrical recording. *Nat Rev Gastroenterol Hepatol.* **14**, 372.
- Hwang SJ, Blair PJ, Britton FC, O'Driscoll KE, Hennig G, Bayguinov YR, Rock JR, Harfe BD, Sanders KM, Ward SM. 2009. Expression of anoctamin 1/TMEM16A by interstitial cells of Cajal is fundamental for slow wave activity in gastrointestinal muscles. *J Physiol.* **587**, 4887-4904.
- Iwata N, Fujimura T, Takai C, Odani K, Kawano S, Nakayama S. 2017. Dialysis membrane-enforced microelectrode array measurement of diverse gut electrical activity. *Biosens. Bioelectron.* **94**, 312–320.
- Kaelberer, M.M., Buchanan, K.L., Klein, M.E., Barth, B.B., Montoya, M.M., Shen, X., Bohórquez D.V. 2018. A gut-brain neural circuit for nutrient sensory transduction. *Science* **361**, eaat5236.

- Kito Y, Suzuki H. 2003. Properties of pacemaker potentials recorded from myenteric interstitial cells of Cajal distributed in the mouse small intestine. *J. Physiol.* **553**, 803–818.
- Kunugi H, Tatsumi M, Sakai T, Hattori M, Nanko S. 1996. Serotonin transporter gene polymorphism and affective disorder. *Lancet* **347**, 1340.
- Lammers WJ, Ver Donck L, Stephen B, Smets D, Schuurkes JA. 2008. Focal activities and re-entrant propagations as mechanisms of gastric tachyarrhythmias. *Gastroenterology* **135**, 1601–1611.
- Lesch KP, Bengel D, Heils A, Sabol SZ, Greenberg BD, Petri S, Benjamin J, Müller CR, Hamer DH, Murphy DL. 1996. Association of anxiety-related traits with a polymorphism in the serotonin transporter gene regulatory region. *Science* **274**, 1527–1531.
- Liu HN, Ohya S, Nishizawa Y, Sawamura K, Iino S, Syed MM, Goto K, Imaizumi Y, Nakayama S. 2011. Serotonin augments gut pacemaker activity via 5-HT<sub>3</sub> receptors. *PLoS One* **6**, e24928.
- Mawe GW, Hoffman JM. 2013. Serotonin signalling in the gut – functions, dysfunctions and therapeutic targets. *Nat. Rev. Gastroenterol. Hepatol.* **10**, 473–486.
- Morishita H, Iwata N, Takai C, Mochizuki N, Kaji N, Hori M, Kajioka S, Nakayama S. 2017. Micro-coordination of pacemaker potentials in the intestine of the mouse. *Gastroenterology* **152**, 1831–1833.e4.
- Murphy DL, Lesch KP. 2008. Targeting the murine serotonin transporter: insights into human neurobiology. *Nat Rev Neurosci.* **9**, 85–96.
- Nakayama S, Shimono K, Liu HN, Jiko H, Katayama N, Tomita T, Goto K. Pacemaker phase shift in the absence of neural activity in guinea-pig stomach: a microelectrode array study. 2006. *J. Physiol.* **576**, 727–738.
- O'Grady G. 2012. Gastrointestinal extracellular electrical recordings: fact or artifact? *Neurogastroenterol Motil.* **24**, 1-6.
- O'Grady G, Paskaranandavadivel N, Du P, Angeli T, Erickson JC, Cheng LK. 2017. Correct techniques for extracellular recordings of electrical activity in gastrointestinal muscle. *Nat Rev Gastroenterol Hepatol.* **14**(6), 372.
- Park KJ, Hennig GW, Lee HT, Spencer NJ, Ward SM, Smith TK, Sanders KM. 2006. Spatial and temporal mapping of pacemaker activity in interstitial cells of Cajal in mouse ileum in situ. *Am J Physiol Cell Physiol.* **290**, C1411-27.
- Saeki T, Kimura T, Hashidume K, Murayama T, Yamamura H, Ohya S, Suzuki Y, Nakayama S, Imaizumi Y. 2019. Conversion of Ca<sup>2+</sup> oscillation into propagative electrical signals by Ca<sup>2+</sup>-activated ion channels and connexin as a reconstituted Ca<sup>2+</sup> clock model for the pacemaker activity. *Biochem. Biophys. Res. Commun.* **510**, 242–247.
- Sanders KM, Ward SM, Hennig GW. 2016. Problems with extracellular recording of electrical activity in gastrointestinal muscle. *Nat Rev Gastroenterol Hepatol.* **13**, 731-741.
- Spencer N, Walsh M, Smith TK, 1999. Does the guinea-pig ileum obey the 'law of the intestine'? *J. Physiol.* **517**, 889–898.
- Spiller RC. 2011. Targeting the 5-HT<sub>3</sub> receptor in the treatment of irritable bowel syndrome. *Curr. Opin. Pharmacol.* **11**, 68–74.

- Strege PR, Bernard CE, Ou Y, Gibbons SJ, Farrugia G. 2005. Effect of mibefradil on sodium and calcium currents. *Am J Physiol Gastrointest Liver Physiol.* **289**, G249–G253.
- Talley NJ. 1992. Review article: 5-hydroxytryptamine agonists and antagonists in the modulation of gastrointestinal motility and sensation: clinical implications. *Aliment. Pharmacol. Ther.* **6**, 273–289.
- Taniguchi M, Kajioka S, Shozib HB, Sawamura K, Nakayama S. 2013. Spatial analysis of slowly oscillating electric activity in the gut of mice using low impedance arrayed microelectrodes. *PLoS One* **8**, e75235.
- Torihashi S, Fujimoto T, Trost C, Nakayama S. 2002. Calcium oscillation linked to pacemaking of interstitial cells of Cajal: requirement of calcium influx and localization of TRP4 in caveolae. *J. Biol. Chem.* **277**, 19191–19197.
- van Helden DF, Imtiaz MS. 2003. Ca<sup>2+</sup> phase waves: a basis for cellular pacemaking and long-range synchronicity in the guinea-pig gastric pylorus. *J Physiol.* **548**, 271–296.
- Van Oudenhove L, Crowell MD, Drossman DA, Halpert AD, Keefer L, Lackner JM, Murphy TB, Naliboff BD, Levy RL. 2016. Biopsychosocial aspects of functional gastrointestinal disorders: how central and environmental processes contribute to the development and expression of functional gastrointestinal disorders. *Gastroenterology* **150**, 1355–1367.e2.
- Zhang ZF, Duan ZJ, Wang LX, Yang D, Zhao G, Zhang L. 2014. The serotonin transporter gene polymorphism (5-HTTLPR) and irritable bowel syndrome: a meta-analysis of 25 studies. *BMC Gastroenterol.* **14**, 23.



Figure 1

**Fig. 1. Dialysis membrane-reinforced microelectrode array (MEA) recordings revealed four different patterns of pacemaker micro-coordination.** (A) Photographs showing a muscle sample isolated from the mouse ileum and mounted on an  $8 \times 8$  MEA

This manuscript was first published as a preprint in bioRxiv, doi:10.1101/2021.05.29.446256

using a piece of dialysis membrane and an anchor. **(B)** Illustration showing the arrangement of the muscle sample and dialysis membrane on the MEA plate. The muscle sheet was positioned with the longitudinal muscle layer facing downward and with the oral and anal ends located toward the upper and lower sensing electrodes, respectively. Each microelectrode (ME) sensed changes in field potential reflecting the flow of local membrane current ( $I_M$ ) through the access resistance ( $R_a$ ) between the ME and a reference electrode. CM: circular muscle; ICC: interstitial cells of Cajal; LM: longitudinal muscle. **(C)** An  $8 \times 8$  plot showing the spontaneous electric activities recorded from a muscle sample in the presence of nifedipine. **(D)** Confocal transmitted light image (upper) and c-kit immunofluorescence image (lower) showing the network of pacemaker interstitial cells of Cajal (ICCs) in the myenteric region (representative of  $\geq 3$  experiments). **(E)** Procedures used for potential mapping (left) and a series of potential images transformed from the time-domain data shown in C. HPF: high-pass filtering; LPF: low-pass filtering. **(F)** Four patterns of pacemaker potential micro-coordination: ‘expanding’, ‘migrating’, ‘bumpy’ and ‘colliding/converging’. Representatives of 1305 pacemaker events in  $N = 49$  series of MEA experiments.



Figure 2

**Fig. 2. Variations of 'expanding' and 'migrating' activities (A,B), and schema showing cellular processes (C,D).** (A) Field potentials recorded continuously by three

This manuscript was first published as a preprint in bioRxiv,  
doi:10.1101/2021.05.29.446256

microelectrodes [ME(25), ME(28) and ME(31)] arranged transversely on the same muscle preparation. The field potential images show three consecutive ‘expanding’ activities that were initiated in different regions: upper-left (Expanding-1), lower-right (Expanding-2) and near the center (Expanding-3), corresponding to E-1\*, E-2\* and E-3\* in continuous field potential recording, respectively.  $M_c$ : maximum potential used for color assignment. Traces of field potential waves recorded by three individual MEs are shown below each series of field potential images. Recorded MEs are indicated by the same color on the MEA. The electric potential wave near the initiating region (blue arrow) lacked a transient positive potential (red arrowhead). Representatives of  $N = 446$  ‘expanding’ activities. **(B)** Field potential images showing three examples of ‘migrating’ activities propagating in different directions: longitudinally in the oro-anal direction (downward; Migrating-L1), longitudinally in the aboral direction (upward; Migrating-L2) and diagonally in the oro-anal direction (circumferentially leftward; Migrating-D1). Traces of representative field potential waves are shown along with each series of field potential images. Transient positive potentials (red arrowheads). Representatives of  $N = 546$  ‘migrating’ activities. **(C,D)** Illustrations showing the cellular processes proposed to underlie ‘migrating’ activity and ‘expanding’ activity, respectively (see text for the explanation). The square cells represent pacemaker interstitial cells along with adjacent smooth muscle cells electrically connected, thereby increasing the electric capacitance.



Figure 3

**Fig. 3. Interconversion of micro-coordination patterns.** (A) Field potentials continuously recorded from a muscle sample by three microelectrodes [ME(10), ME(28) and ME(51)], showing interconversion between the four micro-coordination

This manuscript was first published as a preprint in bioRxiv,  
doi:10.1101/2021.05.29.446256

patterns. Asterisks indicate the pacemaker activities shown as potential maps in **B–F** (representative of  $N = 24$  experiments). **(B)** Potential images of the ‘migrating’ activity shown in **A** (**M\***). **(C)** Potential images of the ‘expanding’ activity shown in **A** (**E\***). **(D)** Potential images of the ‘bumpy’ activity shown in **A** (**B\***) together with superimposed field potential traces recorded by different microelectrodes. **(E)** Potential images of the first ‘colliding’ activity shown in **A** (**C-1\***) together with superimposed field potential traces recorded by different microelectrodes. **(F)** Potential images of the second ‘colliding’ activity shown in **A** (**C-2\***) and the phase that followed. The superimposed field potentials reveal slow potentials in the middle-right region (‘bumpy’ spot), suggesting that this may have caused a ‘bumpy’ event in the next cycle of pacemaker activity.



Figure 4

**Fig. 4 Modulation of micro-coordination patterns by 5-HT.** (A) Field potentials continuously recorded in a sample of ileal musculature in control medium. All activities are of the 'expanding' type. (B) Series of field potential images and superimposed field

This manuscript was first published as a preprint in bioRxiv,  
doi:10.1101/2021.05.29.446256

potential traces for the period marked with a bar in A. **(C, D)** Effects of 5-HT (100  $\mu$ M) on pacemaker activity in the same sample. All activities are of the ‘migrating’ type. **(E, F)** Graphs showing the magnitude (**E**: linear spectrum, 0.25–10.5 Hz) and frequency (**F**: cycles per min [cpm]) of pacemaker activity under control conditions and in the presence of 5-HT. **(G)** Graphs showing the relative contributions of ‘migrating’, ‘expanding’ and ‘other’ types of micro-coordination patterns to pacemaker activity (representative of  $N = 16$  experiments). **(H,I)** Effects of 2-methyl-5-hydroxytryptamine (2Me-5HT) on the magnitude (**H**: linear spectrum, 0.25–10.5 Hz) and frequency (**I**: cpm) of pacemaker activity (representative of  $N = 5$  experiments). Linear spectrum and frequency datasets (in mV and cpm) were compared using paired  $t$ -tests. **(J)** Illustration showing a potential mechanism by which 5-HT might modulate the spatiotemporal characteristics of pacemaker activity.



**Fig. 5. Modulation of micro-coordination patterns by 5-HT in a sample showing frequent ‘bumpy’ activity.** Field potential traces recorded from different microelectrodes and corresponding field potential images obtained under control conditions (A, B) and in the presence of 5-HT (C, D) (representative of  $N = 9$  experiments showing ‘bumpy’ events). The field potential images correspond to the B\* (‘bumpy’ in the control) and M\* (‘migrating’ in 5-HT) events indicated in the field potential traces. During the first half of the control recording period, premature activity-like potentials (red arrowheads) occurred between the ‘bumpy’ activities.



**Fig. 6. Effects of ondansetron on pacemaker activity.** (A, B) Continuous measurement of MEA field potentials and potential images in the presence of 5-hydroxytryptamine, and (C, D) during additional application of ondansetron. The period of potential image processing is shown by the bars in field potentials (A, C). (E, F) Graphs showing changes in the magnitude (linear spectrum, 0.25–10.5 Hz) and frequency (cpm) of pacemaker activity after the application of ondansetron (representative of  $N = 4$  experiments).
